# Supplementary material
Source: Research Square preprint supplement (doi:10.21203/rs.3.rs-7081193/v1)
Supplement: Supplementary file [file 6245ca887e74bae2be4b54c9.pdf]

**Scaling biodiversity-stability relationships from populations  
to meta-communities across trophic levels**

**Supplementary Information**

**Wang et al.**

Table of contents:  
Supplementary figure  
    Figure 1  
Supplementary tables  
    Tables 1-3

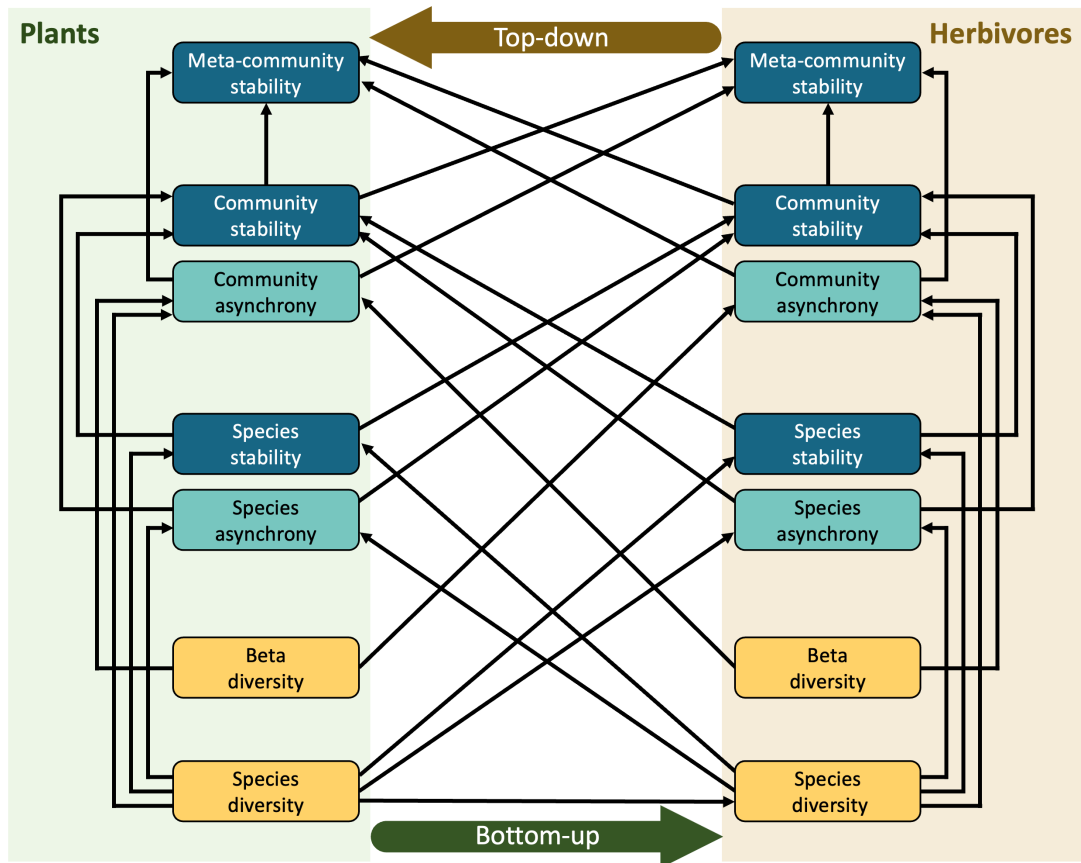

**Fig. S1 Initial model structure of the path models.** Structure based on theoretical expectations and correlations among herbivore- (right panel) and plant-based (left panel) variables: species diversity, species asynchrony, species stability, beta diversity, spatial asynchrony, community stability, and meta-community stability.

**Table S1 Summary identification of results for Lepidoptera herbivore at the family level.**

| Family        | MOTU | Individual |
|---------------|------|------------|
| Unidentified  | 111  | 5023       |
| Erebidae      | 40   | 3413       |
| Geometridae   | 37   | 4294       |
| Noctuidae     | 10   | 180        |
| Notodontidae  | 7    | 232        |
| Psychidae     | 6    | 130        |
| Tortricidae   | 6    | 144        |
| Nolidae       | 5    | 197        |
| Limacodidae   | 3    | 15         |
| Lycaenidae    | 3    | 22         |
| Saturniidae   | 3    | 47         |
| Gelechiidae   | 2    | 13         |
| Lasiocampidae | 2    | 194        |
| Pyralidae     | 2    | 30         |
| Zygaenidae    | 2    | 23         |
| Crambidae     | 1    | 10         |
| Drepanidae    | 1    | 25         |
| Euteliidae    | 1    | 5          |
| Sphingidae    | 1    | 9          |
| Total         | 243  | 14006      |

**Table S2. Structural equation model output for stability determining processes within and across trophic levels (with lavaan package). Statistical tests were two-sided, and no adjustments were made for multiple comparisons.**

| Model                                |                    |      |        |       |             |
|--------------------------------------|--------------------|------|--------|-------|-------------|
| Estimator                            | Maximum likelihood |      |        |       |             |
| Number of observations               | 1000               |      |        |       |             |
| CFI                                  | 0.988              |      |        |       |             |
| RMSEA                                | 0.070              |      |        |       |             |
| SRMR                                 | 0.076              |      |        |       |             |
| Chi-square                           | 327.55             |      |        |       |             |
| Degrees of freedom                   | 55                 |      |        |       |             |
| P(Chi-square)                        | 0                  |      |        |       |             |
| Regressions                          |                    |      |        |       |             |
|                                      | Estimate           | SE   | z      | P     | Stand. Est. |
| Plant meta-community stability ~     |                    |      |        |       |             |
| Plant community stability            | 0.84               | 0.01 | 117.36 | 0.000 | 0.85        |
| Plant community asynchrony           | 0.47               | 0.01 | 71.03  | 0.000 | 0.47        |
| Herbivore community stability        | 0.02               | 0.01 | 2.56   | 0.010 | 0.02        |
| Herbivore community asynchrony       | 0.02               | 0.01 | 2.36   | 0.018 | 0.02        |
| Plant community stability ~          |                    | ~    |        |       |             |
| Plant species stability              | 0.89               | 0.00 | 294.47 | 0.000 | 0.88        |
| Plant species asynchrony             | 0.31               | 0.00 | 75.29  | 0.000 | 0.31        |
| Herbivore species stability          | 0.01               | 0.00 | 3.15   | 0.002 | 0.01        |
| Plant species stability ~            |                    | ~    |        |       |             |
| Plant species diversity              | -0.14              | 0.03 | -5.20  | 0.000 | -0.14       |
| Herbivore species diversity          | 0.35               | 0.03 | 12.15  | 0.000 | 0.36        |
| Plant community asynchrony ~         |                    | ~    |        |       |             |
| Plant beta diversity                 | 0.19               | 0.03 | 6.24   | 0.000 | 0.19        |
| Herbivore beta diversity             | -0.06              | 0.03 | -1.91  | 0.056 | -0.06       |
| Plant species asynchrony ~           |                    | ~    |        |       |             |
| Plant species diversity              | 0.64               | 0.02 | 29.28  | 0.000 | 0.64        |
| Herbivore species diversity          | 0.29               | 0.02 | 14.01  | 0.000 | 0.29        |
| Herbivore meta-community stability ~ |                    | ~    |        |       |             |
| Herbivore community stability        | 0.75               | 0.00 | 273.10 | 0.000 | 0.75        |
| Herbivore community asynchrony       | 0.80               | 0.00 | 299.62 | 0.000 | 0.78        |
| Plant community stability            | -0.02              | 0.00 | -5.62  | 0.000 | -0.02       |
| Plant community asynchrony           | 0.01               | 0.00 | 5.01   | 0.000 | 0.01        |
| Herbivore community stability ~      |                    | ~    |        |       |             |
| Herbivore species stability          | 0.39               | 0.00 | 330.03 | 0.000 | 0.38        |

|                                  |       |      |        |       |       |
|----------------------------------|-------|------|--------|-------|-------|
| Herbivore species asynchrony     | 0.89  | 0.00 | 727.08 | 0.000 | 0.88  |
| Herbivore community asynchrony ~ |       |      |        |       |       |
| Herbivore species diversity      | -0.13 | 0.03 | -4.98  | 0.000 | -0.13 |
| Herbivore beta diversity         | 0.48  | 0.03 | 17.96  | 0.000 | 0.49  |
| Herbivore species asynchrony ~   |       |      |        |       |       |
| Herbivore species diversity      | 0.62  | 0.03 | 24.89  | 0.000 | 0.62  |
| Plant species diversity          | -0.08 | 0.02 | -3.17  | 0.002 | -0.08 |
| Herbivore species diversity ~    | ~     |      |        |       |       |
| Plant species diversity          | 0.06  | 0.03 | 1.81   | 0.070 | 0.06  |

### Covariances

|                                        | Estimate | SE   | z      | P     | Stand. Est. |
|----------------------------------------|----------|------|--------|-------|-------------|
| Herbivore species diversity ~ ~        |          |      |        |       |             |
| Herbivore beta diversity               | -0.15    | 0.03 | 1.47   | 0.142 | 0.05        |
| Plant species diversity ~ ~            |          |      |        |       |             |
| Plant beta diversity                   | -0.15    | 0.03 | -5.30  | 0.000 | -0.17       |
| Herbivore meta-community stability ~ ~ |          |      |        |       |             |
| Herbivore community stability          | 0.00     | 0.00 | -11.33 | 0.000 | -0.38       |
| Herbivore species stability ~ ~        |          |      |        |       |             |
| Herbivore beta diversity               | -0.28    | 0.03 | -8.96  | 0.000 | -0.29       |
| Herbivore community asynchrony ~ ~     |          |      |        |       |             |
| Herbivore species stability            | -0.23    | 0.03 | -9.09  | 0.000 | -0.27       |
| Plant Community stability ~ ~          |          |      |        |       |             |
| Plant species asynchrony               | 0.03     | 0.00 | 10.16  | 0.000 | 0.44        |
| Plant species stability ~ ~            |          |      |        |       |             |
| Plant species asynchrony               | 0.16     | 0.02 | 8.45   | 0.000 | 0.25        |
| Herbivore community asynchrony         | 0.23     | 0.02 | 9.66   | 0.000 | 0.29        |
| Herbivore species asynchrony ~ ~       |          |      |        |       |             |
| Herbivore beta diversity               | 0.14     | 0.02 | 5.86   | 0.000 | 0.18        |
| Plant meta-community stability ~ ~     |          |      |        |       |             |
| Plant community stability              | 0.00     | 0.00 | 5.09   | 0.000 | 0.15        |
| Herbivore species asynchrony ~ ~       |          |      |        |       |             |
| Herbivore species stability            | 0.11     | 0.02 | 4.50   | 0.000 | 0.14        |
| Plant species stability ~ ~            |          |      |        |       |             |
| Herbivore beta diversity               | 0.19     | 0.03 | 7.31   | 0.000 | 0.21        |

### Variances

|                                | Estimate | SE   | z     | P     | Stand. Est. |
|--------------------------------|----------|------|-------|-------|-------------|
| Plant meta-community stability | 0.04     | 0.00 | 22.36 | 0.000 | 0.04        |
| Plant community stability      | 0.01     | 0.00 | 19.20 | 0.000 | 0.01        |
| Plant species stability        | 0.84     | 0.04 | 22.63 | 0.000 | 0.84        |
| Plant community asynchrony     | 0.96     | 0.04 | 22.36 | 0.000 | 0.96        |
| Plant species asynchrony       | 0.49     | 0.02 | 22.46 | 0.000 | 0.49        |
| Plant species diversity        | 1.00     | 0.05 | 22.36 | 0.000 | 1.00        |

|                                    |      |      |       |       |      |
|------------------------------------|------|------|-------|-------|------|
| Plant beta diversity               | 1.00 | 0.05 | 22.36 | 0.000 | 1.00 |
| Herbivore meta-community stability | 0.01 | 0.00 | 22.36 | 0.000 | 0.01 |
| Herbivore community stability      | 0.00 | 0.00 | 22.36 | 0.000 | 0.00 |
| Herbivore species stability        | 1.00 | 0.04 | 22.43 | 0.000 | 1.00 |
| Herbivore community asynchrony     | 0.72 | 0.03 | 22.51 | 0.000 | 0.72 |
| Herbivore species asynchrony       | 0.62 | 0.03 | 22.36 | 0.000 | 0.62 |
| Herbivore species diversity        | 1.00 | 0.05 | 22.36 | 0.000 | 1.00 |
| Herbivore beta diversity           | 0.98 | 0.04 | 22.51 | 0.000 | 0.98 |

### **R-Square**

|                                    | Estimate |
|------------------------------------|----------|
| Plant meta-community stability     | 0.95     |
| Plant community stability          | 0.99     |
| Plant species stability            | 0.14     |
| Plant community asynchrony         | 0.04     |
| Plant species asynchrony           | 0.51     |
| Herbivore meta-community stability | 0.99     |
| Herbivore community stability      | 0.99     |
| Herbivore community asynchrony     | 0.25     |
| Herbivore species asynchrony       | 0.38     |
| Herbivore species diversity        | 0.00     |

**Table S3. Structural equation model output for stability determining processes within and across trophic levels (with piecewiseSEM package). Chi-Squared = 543.902 with P-value = 0 and on 46 degrees of freedom; Fisher's C = 88.298 with P-value = 0.246 and on 80 degrees of freedom. Statistical tests were two-sided, and no adjustments were made for multiple comparisons.**

| <b>Response variable</b>           | <b>Predictor</b>               | <b>Est.</b> | <b>SE</b> | <b>DF</b> | <b>P</b> | <b>Stand. Est.</b> |
|------------------------------------|--------------------------------|-------------|-----------|-----------|----------|--------------------|
| Plant meta-community staility      | Plant community staility       | 0.85        | 0.01      | 995       | 0.000    | 0.85               |
| Plant meta-community staility      | Plant community asynchrony     | 0.46        | 0.01      | 995       | 0.000    | 0.46               |
| Plant meta-community staility      | Herbivore community stability  | 0.02        | 0.01      | 995       | 0.024    | 0.02               |
| Plant meta-community staility      | Herbivore community asynchrony | 0.02        | 0.01      | 995       | 0.030    | 0.02               |
| Plant community staility           | Plant species staility         | 0.88        | 0.00      | 1000      | 0.000    | 0.88               |
| Plant community staility           | Plant species asynchrony       | 0.33        | 0.00      | 1000      | 0.000    | 0.33               |
| Plant community staility           | Herbivore species stability    | 0.01        | 0.00      | 1000      | 0.020    | 0.01               |
| Plant species staility             | Plant species diversity        | -0.10       | 0.03      | 1000      | 0.000    | -0.10              |
| Plant species staility             | Herbivore species diversity    | 0.12        | 0.03      | 1000      | 0.000    | 0.12               |
| Plant community asynchrony         | Plant beta diversity           | 0.21        | 0.03      | 1000      | 0.000    | 0.21               |
| Plant community asynchrony         | Herbivore beta diversity       | -0.03       | 0.03      | 1000      | 0.398    | -0.03              |
| Plant species asynchrony           | Plant species diversity        | 0.66        | 0.02      | 1000      | 0.000    | 0.66               |
| Plant species asynchrony           | Herbivore species diversity    | 0.23        | 0.02      | 1000      | 0.000    | 0.23               |
| Herbivore meta-community stability | Herbivore community stability  | 0.75        | 0.00      | 995       | 0.000    | 0.75               |
| Herbivore meta-community stability | Herbivore community asynchrony | 0.80        | 0.00      | 995       | 0.000    | 0.80               |
| Herbivore meta-community stability | Plant community staility       | -0.02       | 0.00      | 995       | 0.000    | -0.02              |
| Herbivore meta-community stability | Plant community asynchrony     | 0.01        | 0.00      | 995       | 0.000    | 0.01               |
| Herbivore community stability      | Herbivore species stability    | 0.39        | 0.00      | 997       | 0.000    | 0.39               |
| Herbivore community stability      | Herbivore species asynchrony   | 0.89        | 0.00      | 997       | 0.000    | 0.89               |

|                                      |                                  |       |      |      |       |       |
|--------------------------------------|----------------------------------|-------|------|------|-------|-------|
| Herbivore community asynchrony       | Herbivore species diversity      | -0.32 | 0.03 | 1000 | 0.000 | -0.32 |
| Herbivore community asynchrony       | Herbivore beta diversity         | 0.39  | 0.02 | 1000 | 0.000 | 0.39  |
| Herbivore species asynchrony         | Herbivore species diversity      | 0.70  | 0.03 | 1000 | 0.000 | 0.70  |
| Herbivore species asynchrony         | Plant species diversity          | -0.14 | 0.02 | 1000 | 0.000 | -0.14 |
| Herbivore species diversity          | Plant species diversity          | 0.10  | 0.03 | 1000 | 0.001 | 0.10  |
| <b>Covariances</b>                   |                                  |       |      |      |       |       |
| ~~Herbivore meta-community stability | ~~Herbivore community stability  | 0.99  | -    | 1000 | 0.000 | 0.99  |
| ~~Herbivore species stability        | ~~Herbivore beta diversity       | -0.33 | -    | 998  | 0.000 | -0.33 |
| ~~Herbivore community asynchrony     | ~~Herbivore species stability    | -0.25 | -    | 1000 | 0.000 | -0.25 |
| ~~Plant community stability          | ~~Plant species asynchrony       | 0.97  | -    | 1000 | 0.000 | 0.97  |
| ~~Plant species stability            | ~~Plant species asynchrony       | 0.26  | -    | 1000 | 0.000 | 0.26  |
| ~~Plant species stability            | ~~Herbivore community asynchrony | 0.14  | -    | 1000 | 0.000 | 0.14  |
| ~~Herbivore species asynchrony       | ~~Herbivore beta diversity       | 0.23  | -    | 1000 | 0.000 | 0.23  |
| ~~Plant meta-community stability     | ~~Plant community stability      | 0.97  | -    | 1000 | 0.000 | 0.97  |
| ~~Herbivore species asynchrony       | ~~Herbivore species stability    | 0.08  | -    | 1000 | 0.006 | 0.08  |
| ~~Plant species stability            | ~~Herbivore beta diversity       | 0.22  | -    | 1000 | 0.000 | 0.22  |
| ~~Plant species stability            | ~~Herbivore species stability    | -0.09 | -    | 1000 | 0.003 | -0.09 |
| ~~Plant species asynchrony           | ~~Herbivore species stability    | -0.12 | -    | 1000 | 0.000 | -0.12 |
| ~~Herbivore species diversity        | ~~Herbivore species stability    | 0.10  | -    | 1000 | 0.001 | 0.10  |
| ~~Plant community stability          | ~~Plant species diversity        | -0.21 | -    | 1000 | 0.000 | -0.21 |

|                                  |                                 |       |   |      |       |       |
|----------------------------------|---------------------------------|-------|---|------|-------|-------|
| ~~Herbivore community asynchrony | ~~Plant species diversity       | 0.09  | - | 1000 | 0.001 | 0.09  |
| ~~Plant meta-community staility  | ~~Plant beta diversity          | 0.08  | - | 1000 | 0.006 | 0.08  |
| ~~Plant species asynchrony       | ~~Herbivore beta diversity      | 0.13  | - | 1000 | 0.000 | 0.13  |
| ~~Plant meta-community staility  | ~~Herbivore beta diversity      | 0.10  | - | 1000 | 0.001 | 0.10  |
| ~~Plant species staility         | ~~Plant community asynchrony    | 0.14  | - | 1000 | 0.000 | 0.14  |
| ~~Plant species asynchrony       | ~~Plant community asynchrony    | 0.07  | - | 1000 | 0.014 | 0.07  |
| ~~Herbivore species diversity    | ~~Plant community asynchrony    | -0.15 | - | 1000 | 0.000 | -0.15 |
| ~~Herbivore species asynchrony   | ~~Plant species asynchrony      | -0.20 | - | 1000 | 0.000 | -0.20 |
| ~~Plant community staility       | ~~Herbivore species diversity   | -0.16 | - | 1000 | 0.000 | -0.16 |
| ~~Herbivore community asynchrony | ~~Herbivore species asynchrony  | 0.15  | - | 1000 | 0.000 | 0.15  |
| ~~Herbivore community asynchrony | ~~Herbivore community stability | -0.08 | - | 1000 | 0.007 | -0.08 |

---

### R-Square

| Response                           | Method | Marginal | Conditional |
|------------------------------------|--------|----------|-------------|
| Plant meta-community staility      | none   | 0.96     | NA          |
| Plant community staility           | none   | 0.99     | 0.99        |
| Plant species staility             | none   | 0.03     | 0.32        |
| Plant community asynchrony         | none   | 0.04     | 0.06        |
| Plant species asynchrony           | none   | 0.5      | 0.51        |
| Herbivore meta-community stability | none   | 0.99     | NA          |
| Herbivore community stability      | none   | 1        | NA          |
| Herbivore community asynchrony     | none   | 0.24     | 0.46        |
| Herbivore species asynchrony       | none   | 0.44     | 0.48        |
| Herbivore species diversity        | none   | 0.01     | 0.2         |

---
